# Supplementary material for: Stability of the polyynic form of C18, C22, C26, and C30nanorings: a challenge tackled by range-separated double-hybrid density functionals
Source: Royal Society of Chemistry journal article supplement (doi:10.1039/d1cp04996h), 2022-01-01
Supplement: d1cp04996h1.pdf [file d1cp04996h1.pdf]

–Supplementary Material–  
**Stability of the Polyynic Form of C<sub>18</sub>, C<sub>22</sub>,  
C<sub>26</sub>, and C<sub>30</sub> Nanorings: A Challenge  
Tackled by Range-Separated  
Double-Hybrid Density Functionals**

E. Brémond<sup>a</sup>, A.J. Pérez-Jiménez<sup>b</sup>,  
C. Adamo<sup>c,d</sup>, J. C. Sancho-García<sup>b\*</sup>

<sup>a</sup> Université de Paris, ITODYS, CNRS,  
F-75006 Paris, France

<sup>b</sup> Department of Physical Chemistry,  
University of Alicante,  
E-03080 Alicante, Spain

<sup>c</sup> Chimie ParisTech, PSL Research University, CNRS,  
Institute of Chemistry for Life and Health Sciences (i-CLeHS), FRE 2027,  
F-75005 Paris, France

<sup>d</sup> Institut Universitaire de France, 103 Boulevard Saint Michel,  
F-75005 Paris, France

November 2, 2021

---

\*E-mail: [jc.sancho@ua.es](mailto:jc.sancho@ua.es)

## Running a RSX-QIDH calculation

A RSX-QIDH single-point calculation can be run with the following route card, omitting basis set specification and any other option, using the GAUSSIAN'16 (C.01 release) program:

```
#P PBEQIDH IOP(3/74=1001009,3/78=0666606666,3/107=0270000000,  
3/108=0270000000,3/119=0310000000,3/120=0310000000,  
3/125=0333403334,3/130=06900,3/131=06900)
```

## Details of the Monte Carlo calculations

Table S1: Total number of variationally optimized parameters ( $M$ ) of the VMC calculations for each molecule.

| Molecule                  | $M$  |
|---------------------------|------|
| C <sub>18</sub> polyynic  | 1204 |
| C <sub>18</sub> cumulenic | 1062 |
| C <sub>22</sub> polyynic  | 1218 |
| C <sub>22</sub> cumulenic | 1190 |
| C <sub>26</sub> polyynic  | 1378 |
| C <sub>26</sub> cumulenic | 646  |

Table S2: Values of  $\Delta E(C_n)$  (kcal/mol) for the systems studied, with the BFD pseudopotential and the VTZ basis sets.

| Method      | C <sub>18</sub>  | C <sub>22</sub>  | C <sub>26</sub>  | MSD   | MAD  | RMSD |
|-------------|------------------|------------------|------------------|-------|------|------|
| CASSCF      | -0.758           | -1.722           | -2.532           | -1.09 | 1.09 | 1.19 |
| CASSCF-SOCI | -0.692           | -1.505           | -2.265           | -0.91 | 0.91 | 0.99 |
| Reference   | $-0.27 \pm 0.02$ | $-0.58 \pm 0.02$ | $-0.89 \pm 0.02$ |       |      |      |

Table S3: Absolute energy values (in  $E_h$ ) and their uncertainties for the systems studied, at the DMC level.

| Molecule        | $E(C_n; \text{cumulenic})$ | $E(C_n; \text{polyynic})$  |
|-----------------|----------------------------|----------------------------|
| C <sub>18</sub> | $-101.674968 \pm 0.000325$ | $-101.682724 \pm 0.000332$ |
| C <sub>22</sub> | $-124.291386 \pm 0.000380$ | $-124.311847 \pm 0.000397$ |
| C <sub>26</sub> | $-146.902668 \pm 0.000458$ | $-146.939596 \pm 0.000506$ |

## All results for $C_{30}$

Table S4: Values of  $\Delta E(C_n)$  (kcal/mol) for  $C_{30}$ , with the def2-QZVP basis sets.

|                    | Method     | $C_{30}$ |
|--------------------|------------|----------|
|                    | PBE        | 0.941    |
| GH functionals     | B3LYP      | 0.093    |
|                    | PBE0       | -0.044   |
|                    | PBE0-1/3   | -0.444   |
|                    | M06-2X     | -1.388   |
| DH functionals     | PBE0-DH    | -0.112   |
|                    | B2-PLYP    | 1.054    |
|                    | B2GP-PLYP  | 1.087    |
|                    | PBE-QIDH   | 0.598    |
| SOS-DH functionals | DSD-PBEP86 | 0.688    |
|                    | SOS1-QIDH  | -0.799   |

# Atomic cartesian coordinates

Table S5: Cartesian coordinates of C<sub>18</sub> cumulenic form.

|   |           |           |          |
|---|-----------|-----------|----------|
| C | 0.000000  | 3.662004  | 0.000000 |
| C | 1.252479  | 3.441158  | 0.000000 |
| C | 2.353891  | 2.805258  | 0.000000 |
| C | 3.171388  | 1.831002  | 0.000000 |
| C | 3.606370  | 0.635900  | 0.000000 |
| C | 3.606370  | -0.635900 | 0.000000 |
| C | 3.171388  | -1.831002 | 0.000000 |
| C | 2.353891  | -2.805258 | 0.000000 |
| C | 1.252479  | -3.441158 | 0.000000 |
| C | -0.000000 | -3.662004 | 0.000000 |
| C | -1.252479 | -3.441158 | 0.000000 |
| C | -2.353891 | -2.805258 | 0.000000 |
| C | -3.171388 | -1.831002 | 0.000000 |
| C | -3.606370 | -0.635900 | 0.000000 |
| C | -3.606370 | 0.635900  | 0.000000 |
| C | -3.171388 | 1.831002  | 0.000000 |
| C | -2.353891 | 2.805258  | 0.000000 |
| C | -1.252479 | 3.441158  | 0.000000 |

Table S6: Cartesian coordinates of C<sub>18</sub> polyynic form.

|   |          |           |           |
|---|----------|-----------|-----------|
| C | 0.000000 | 0.609809  | -3.635424 |
| C | 0.000000 | 1.869910  | -3.176949 |
| C | 0.000000 | 2.804183  | -2.393056 |
| C | 0.000000 | 3.474620  | -1.231846 |
| C | 0.000000 | 3.686373  | -0.030779 |
| C | 0.000000 | 3.453489  | 1.289685  |
| C | 0.000000 | 2.843647  | 2.345862  |
| C | 0.000000 | 1.816475  | 3.207701  |
| C | 0.000000 | 0.670419  | 3.624806  |
| C | 0.000000 | -0.670419 | 3.624806  |
| C | 0.000000 | -1.816475 | 3.207701  |
| C | 0.000000 | -2.843647 | 2.345862  |
| C | 0.000000 | -3.453489 | 1.289685  |
| C | 0.000000 | -3.686373 | -0.030779 |
| C | 0.000000 | -3.474620 | -1.231846 |
| C | 0.000000 | -2.804183 | -2.393056 |
| C | 0.000000 | -1.869910 | -3.176949 |
| C | 0.000000 | -0.609809 | -3.635424 |

Table S7: Cartesian coordinates of C<sub>22</sub> cumulenic form.

|   |           |           |          |
|---|-----------|-----------|----------|
| C | 0.000000  | 4.466246  | 0.000000 |
| C | 1.258287  | 4.285332  | 0.000000 |
| C | 2.414635  | 3.757245  | 0.000000 |
| C | 3.375363  | 2.924769  | 0.000000 |
| C | 4.062640  | 1.855346  | 0.000000 |
| C | 4.420786  | 0.635613  | 0.000000 |
| C | 4.420786  | -0.635613 | 0.000000 |
| C | 4.062640  | -1.855346 | 0.000000 |
| C | 3.375363  | -2.924769 | 0.000000 |
| C | 2.414635  | -3.757245 | 0.000000 |
| C | 1.258287  | -4.285332 | 0.000000 |
| C | -0.000000 | -4.466246 | 0.000000 |
| C | -1.258287 | -4.285332 | 0.000000 |
| C | -2.414635 | -3.757245 | 0.000000 |
| C | -3.375363 | -2.924769 | 0.000000 |
| C | -4.062640 | -1.855346 | 0.000000 |
| C | -4.420786 | -0.635613 | 0.000000 |
| C | -4.420786 | 0.635613  | 0.000000 |
| C | -4.062640 | 1.855346  | 0.000000 |
| C | -3.375363 | 2.924769  | 0.000000 |
| C | -2.414635 | 3.757245  | 0.000000 |
| C | -1.258287 | 4.285332  | 0.000000 |

Table S8: Cartesian coordinates of  $C_{22}$  polyynic form.

|   |          |           |           |
|---|----------|-----------|-----------|
| C | 0.000000 | -0.607675 | -4.458668 |
| C | 0.000000 | -1.899366 | -4.079433 |
| C | 0.000000 | -2.921776 | -3.422378 |
| C | 0.000000 | -3.803384 | -2.404975 |
| C | 0.000000 | -4.308252 | -1.299471 |
| C | 0.000000 | -4.499838 | 0.033059  |
| C | 0.000000 | -4.326872 | 1.236019  |
| C | 0.000000 | -3.767621 | 2.460591  |
| C | 0.000000 | -2.971741 | 3.379072  |
| C | 0.000000 | -1.839218 | 4.106894  |
| C | 0.000000 | -0.673114 | 4.449289  |
| C | 0.000000 | 0.673114  | 4.449289  |
| C | 0.000000 | 1.839218  | 4.106894  |
| C | 0.000000 | 2.971741  | 3.379072  |
| C | 0.000000 | 3.767621  | 2.460591  |
| C | 0.000000 | 4.326872  | 1.236019  |
| C | 0.000000 | 4.499838  | 0.033059  |
| C | 0.000000 | 4.308252  | -1.299471 |
| C | 0.000000 | 3.803384  | -2.404975 |
| C | 0.000000 | 2.921776  | -3.422378 |
| C | 0.000000 | 1.899366  | -4.079433 |
| C | 0.000000 | 0.607675  | -4.458668 |



Table S9: Cartesian coordinates of C<sub>26</sub> cumulenenic form.

|   |           |           |          |
|---|-----------|-----------|----------|
| C | 0.000000  | 5.272423  | 0.000000 |
| C | 1.261773  | 5.119216  | 0.000000 |
| C | 2.450217  | 4.668499  | 0.000000 |
| C | 3.496263  | 3.946465  | 0.000000 |
| C | 4.339119  | 2.995078  | 0.000000 |
| C | 4.929801  | 1.869627  | 0.000000 |
| C | 5.233981  | 0.635520  | 0.000000 |
| C | 5.233981  | -0.635520 | 0.000000 |
| C | 4.929801  | -1.869627 | 0.000000 |
| C | 4.339119  | -2.995078 | 0.000000 |
| C | 3.496263  | -3.946465 | 0.000000 |
| C | 2.450217  | -4.668499 | 0.000000 |
| C | 1.261773  | -5.119216 | 0.000000 |
| C | -0.000000 | -5.272423 | 0.000000 |
| C | -1.261773 | -5.119216 | 0.000000 |
| C | -2.450217 | -4.668499 | 0.000000 |
| C | -3.496263 | -3.946465 | 0.000000 |
| C | -4.339119 | -2.995078 | 0.000000 |
| C | -4.929801 | -1.869627 | 0.000000 |
| C | -5.233981 | -0.635520 | 0.000000 |
| C | -5.233981 | 0.635520  | 0.000000 |
| C | -4.929801 | 1.869627  | 0.000000 |
| C | -4.339119 | 2.995078  | 0.000000 |
| C | -3.496263 | 3.946465  | 0.000000 |
| C | -2.450217 | 4.668499  | 0.000000 |
| C | -1.261773 | 5.119216  | 0.000000 |

Table S10: Cartesian coordinates of C<sub>26</sub> polyynic form.

---

|   |          |           |           |
|---|----------|-----------|-----------|
| C | 0.000000 | 0.606904  | -5.277758 |
| C | 0.000000 | 1.915367  | -4.955277 |
| C | 0.000000 | 2.990176  | -4.391202 |
| C | 0.000000 | 3.998950  | -3.497635 |
| C | 0.000000 | 4.688553  | -2.498718 |
| C | 0.000000 | 5.166452  | -1.238677 |
| C | 0.000000 | 5.312777  | -0.033697 |
| C | 0.000000 | 5.150323  | 1.304099  |
| C | 0.000000 | 4.719863  | 2.439041  |
| C | 0.000000 | 3.954281  | 3.548082  |
| C | 0.000000 | 3.045681  | 4.352964  |
| C | 0.000000 | 1.852389  | 4.979176  |
| C | 0.000000 | 0.673811  | 5.269602  |
| C | 0.000000 | -0.673811 | 5.269602  |
| C | 0.000000 | -1.852389 | 4.979176  |
| C | 0.000000 | -3.045681 | 4.352964  |
| C | 0.000000 | -3.954281 | 3.548082  |
| C | 0.000000 | -4.719863 | 2.439041  |
| C | 0.000000 | -5.150323 | 1.304099  |
| C | 0.000000 | -5.312777 | -0.033697 |
| C | 0.000000 | -5.166452 | -1.238677 |
| C | 0.000000 | -4.688553 | -2.498718 |
| C | 0.000000 | -3.998950 | -3.497635 |
| C | 0.000000 | -2.990176 | -4.391202 |
| C | 0.000000 | -1.915367 | -4.955277 |
| C | 0.000000 | -0.606904 | -5.277758 |

---

Table S11: Cartesian coordinates of C<sub>30</sub> cumulenenic form.

|   |           |           |          |
|---|-----------|-----------|----------|
| C | -0.000000 | 6.078424  | 0.000000 |
| C | 1.263775  | 5.945595  | 0.000000 |
| C | 2.472318  | 5.552916  | 0.000000 |
| C | 3.572808  | 4.917548  | 0.000000 |
| C | 4.517149  | 4.067259  | 0.000000 |
| C | 5.264069  | 3.039212  | 0.000000 |
| C | 5.780924  | 1.878336  | 0.000000 |
| C | 6.045125  | 0.635368  | 0.000000 |
| C | 6.045125  | -0.635368 | 0.000000 |
| C | 5.780924  | -1.878336 | 0.000000 |
| C | 5.264069  | -3.039212 | 0.000000 |
| C | 4.517149  | -4.067259 | 0.000000 |
| C | 3.572808  | -4.917548 | 0.000000 |
| C | 2.472318  | -5.552916 | 0.000000 |
| C | 1.263775  | -5.945595 | 0.000000 |
| C | -0.000000 | -6.078424 | 0.000000 |
| C | -1.263775 | -5.945595 | 0.000000 |
| C | -2.472318 | -5.552916 | 0.000000 |
| C | -3.572808 | -4.917548 | 0.000000 |
| C | -4.517149 | -4.067259 | 0.000000 |
| C | -5.264069 | -3.039212 | 0.000000 |
| C | -5.780924 | -1.878336 | 0.000000 |
| C | -6.045125 | -0.635368 | 0.000000 |
| C | -6.045125 | 0.635368  | 0.000000 |
| C | -5.780924 | 1.878336  | 0.000000 |
| C | -5.264069 | 3.039212  | 0.000000 |
| C | -4.517149 | 4.067259  | 0.000000 |
| C | -3.572808 | 4.917548  | 0.000000 |
| C | -2.472318 | 5.552916  | 0.000000 |
| C | -1.263775 | 5.945595  | 0.000000 |

Table S12: Cartesian coordinates of C<sub>30</sub> polyynic form.

|   |           |           |          |
|---|-----------|-----------|----------|
| C | -5.287746 | 3.092058  | 0.000000 |
| C | -5.835903 | 1.860605  | 0.000000 |
| C | -6.088064 | 0.673944  | 0.000000 |
| C | -6.088143 | -0.673998 | 0.000000 |
| C | -5.835989 | -1.860661 | 0.000000 |
| C | -5.287760 | -3.092080 | 0.000000 |
| C | -4.574703 | -4.073559 | 0.000000 |
| C | -3.572996 | -4.975519 | 0.000000 |
| C | -2.522374 | -5.582104 | 0.000000 |
| C | -1.240402 | -5.998632 | 0.000000 |
| C | -0.033890 | -6.125431 | 0.000000 |
| C | 1.306666  | -5.984513 | 0.000000 |
| C | 2.460440  | -5.609607 | 0.000000 |
| C | 3.627784  | -4.935619 | 0.000000 |
| C | 4.529325  | -4.123848 | 0.000000 |
| C | 5.321616  | -3.033332 | 0.000000 |
| C | 5.815042  | -1.925054 | 0.000000 |
| C | 6.095288  | -0.606565 | 0.000000 |
| C | 6.095287  | 0.606592  | 0.000000 |
| C | 5.815042  | 1.925081  | 0.000000 |
| C | 5.321615  | 3.033357  | 0.000000 |
| C | 4.529326  | 4.123875  | 0.000000 |
| C | 3.627785  | 4.935646  | 0.000000 |
| C | 2.460440  | 5.609631  | 0.000000 |
| C | 1.306665  | 5.984536  | 0.000000 |
| C | -0.033890 | 6.125466  | 0.000000 |
| C | -1.240401 | 5.998649  | 0.000000 |
| C | -2.522347 | 5.582041  | 0.000000 |
| C | -3.572977 | 4.975470  | 0.000000 |
| C | -4.574738 | 4.073570  | 0.000000 |
